# Supplementary material for: Macrophyte communities as bioindicator of stormwater pollution in rivers: a quantitative analysis
Source: PeerJ. 2023 Jun 1;11:e15248. doi: 10.7717/peerj.15248 (PMC10239615; doi:10.7717/peerj.15248)
Supplement: Supplemental Information 1 [file peerj-11-15248-s001.xlsx]

## Sheet: data_station_rivers
17 sp x 14 st			after st1n					stok2 _20	after 2 _150
Species	code	P1	Psk1	P2	P3	P4	P5	Psk2	Psk3	P6	P7	P8	P9	P10	P11	Bst9	Bst10	Bst11	B1	B2	B3	B4	B5	B6	B7
Glyceria maxima	Glymax	5	0	10	0	30	0	2	0	5	11	15	10	6	7	1	6	4	12	11	10	17	19	21	29
Nuphar lutea	Nuphlut	20	32	20	0	20	20	30	8	6	8	10	9	12	7	21	18	23	10	8	11	10	9	7	5
Ceratophyllum demersum	Cerdem	20	35	20	10	20	30	15	10	5	7	10	6	8	10	12	25	27	2	4	7	3	9	11	10
Persicaria amphibia	Peramph	1	0	0	0	0	0	0	0	0	1	0	2	1	0	0	0	0	1	2	1	2	0	1	2
Myriophyllum spicatum	Myrspic	1	10	0	0	0	0	20	15	0	0	0	1	0	2	0	0	0	3	2	0	1	1	2	3
Sagittaria sagittifolia	Sagsag	2	0	0	0	0	0	3	5	10	15	11	10	8	10	3	1	1	25	31	27	19	0	1	0
Typha angustifolia	Typhang	3	0	0	15	2	15	0	0	0	5	0	6	7	0	0	0	0	5	7	12	11	4	21	13
Typha latifolia	Typhlat	0	20	0	0	0	0	25	15	0	0	2	0	0	3	12	21	24	10	4	7	5	2	7	1
Sparganium erectum	Sparerect	0	5	0	0	0	0	3	7	0	1	0	2	0	0	3	8	12	1	2	1	0	0	1	2
Sparganium emersum	Sparemer	0	2	0	0	0	0	0	0	0	0	0	0	0	0	1	2	0	12	14	19	21	23	31	30
Hydrocharis morsus-ranae	Hydmors	0	1	0	5	0	0	1	0	3	3	4	2	2	1	0	1	1	2	3	4	2	5	1	3
Phragmites australis	Phraus	0	0	0	10	0	0	0	0	0	2	0	5	2	1	1	0	1	15	12	11	10	9	7	8
Lemna minor	Lemmin	0	0	0	15	0	0	8	10	0	3	5	4	6	2	2	8	9	2	1	3	0	1	4	0
Spirodela polyrrhiza	Spipol	0	0	0	5	0	0	3	2	0	1	1	1	2	1	3	7	9	1	2	0	0	1	1	0
Acorus calamus	Acocal	0	0	0	1	0	0	0	0	0	0	0	0	0	0	0	0	0	0	0	0	0	0	0	0
Oenanthe aquatica	Oenaqu	0	0	0	0	0	0	0	0	0	0	0	0	0	0	0	0	0	0	1	1	0	1	1	2
Trapa natans	Tranat	0	0	0	0	0	0	0	0	0	0	0	0	0	0	0	0	0	0	0	0	0	0	0	0
Stuckenia pectinata (Potamogeton pectinatus)	Potpect	0	0	0	0	0	0	0	0	0	0	0	0	0	0	30	25	20	2	0	2	4	0	1	3
Potamogeton crispus	Potcris	0	0	0	0	0	0	0	0	0	0	0	0	0	0	15	10	20	2	4	5	4	6	2	3
Potamogeton natans	Potnat	0	0	0	0	0	0	0	0	0	0	0	0	0	0	3	5	7	1	2	0	2	1	0	3
Potamogeton perfoliatus	Potperf	0	0	0	0	0	0	0	0	0	0	0	0	0	0	0	0	0	1	2	3	3	4	1	1

## Sheet: data_species
Group	Station	Glymax	Nuphlut	Cerdem	Peramph	Myrspic	Sagsag	Typhang	Typhlat	Sparerect	Sparemer	Hydmors	Phraus	Lemmin	Spipol	Acocal	Oenaqu	Tranat	Potpect	Potcris	Potnat	Potperf	Elocan	Flow	Wastewater
p	P1	5	20	20	1	1	2	3	0	0	0	0	0	0	0	0	0	0	0	0	0	0	0	0.2	0
pw	Pw1	0	32	35	0	10	0	0	20	5	2	1	0	0	0	0	0	0	0	0	0	0	9	0.2	1
p	P2	10	20	20	0	0	0	0	0	0	0	0	0	0	0	0	0	0	0	0	0	0	1	0.2	0
p	P3	0	0	10	0	0	0	15	0	0	0	5	10	15	5	1	0	0	0	0	0	0	0	0.2	0
o	P4	30	20	20	0	0	0	2	0	0	0	0	0	0	0	0	0	0	0	0	0	0	2	0.2	0
p	P5	0	20	30	0	0	0	15	0	0	0	0	0	0	0	0	0	0	0	0	0	0	0	0.1	0
pw	Pw2	2	30	15	0	20	3	0	25	3	0	1	0	8	3	0	0	0	0	0	0	0	5	0.2	1
pw	Pw3	0	8	10	0	15	5	0	15	7	0	0	0	10	2	0	0	0	0	0	0	0	7	0.2	1
p	P6	5	6	5	0	0	10	0	0	0	0	3	0	0	0	0	0	0	0	0	0	0	0	0.1	0
p	P7	11	8	7	1	0	15	5	0	1	0	3	2	3	1	0	0	0	0	0	0	0	1	0.2	0
p	P8	15	10	10	0	0	11	0	2	0	0	4	0	5	1	0	0	0	0	0	0	0	0	0.2	0
p	P9	10	9	6	2	1	10	6	0	2	0	2	5	4	1	0	0	0	0	0	0	0	2	0.3	0
p	P10	6	12	8	1	0	8	7	0	0	0	2	2	6	2	0	0	0	0	0	0	0	0	0.2	0
p	P11	7	7	10	0	2	10	0	3	0	0	1	1	2	1	0	0	0	0	0	0	0	2	0.1	0
bw	Bw9	1	21	12	0	0	3	0	12	3	1	0	1	2	3	0	0	0	30	15	3	0	11	0.8	1
bw	Bw10	6	18	25	0	0	1	0	21	8	2	1	0	8	7	0	0	0	25	10	5	0	19	1	1
bw	Bw11	4	23	27	0	0	1	0	24	12	0	1	1	9	9	0	0	0	20	20	7	0	28	1.2	1
b	B1	12	10	2	1	3	25	5	10	1	12	2	15	2	1	0	0	0	2	2	1	1	0	1.2	0
b	B2	11	8	4	2	2	31	7	4	2	14	3	12	1	2	0	1	0	0	4	2	2	2	1	0
b	B3	10	11	7	1	0	27	12	7	1	19	4	11	3	0	0	1	0	2	5	0	3	0	0.9	0
b	B4	17	10	3	2	1	19	11	5	0	21	2	10	0	0	0	0	0	4	4	2	3	5	0.5	0
b	B5	19	9	9	0	1	0	4	2	0	23	5	9	1	1	0	1	0	0	6	1	4	0	1.3	0
b	B6	21	7	11	1	2	1	21	7	1	31	1	7	4	1	0	1	0	1	2	0	1	0	1.2	0
b	B7	29	5	10	2	3	0	13	1	2	30	3	8	0	0	0	2	0	3	3	3	1	4	1	0

## Sheet: data
River,Group,Station,Glymax,Nuphlut,Cerdem,Peramph,Myrspic,Sagsag,Typhang,Typhlat,Sparerect,Sparemer,Hydmors,Phraus,Lemmin,Spipol,Acocal,Oenaqu,Tranat,Potpect,Potcris ,Potnat,Potperf,Elocan,Flow,Wastewater
P,p,P1,5,20,20,1,1,2,3,0,0,0,0,0,0,0,0,0,0,0,0,0,0,0,0.2,0
P,pw,Pw1,0,32,35,0,10,0,0,20,5,2,1,0,0,0,0,0,0,0,0,0,0,9,0.2,1
P,p,P2,10,20,20,0,0,0,0,0,0,0,0,0,0,0,0,0,0,0,0,0,0,1,0.2,0
P,p,P3,0,0,10,0,0,0,15,0,0,0,5,10,15,5,1,0,0,0,0,0,0,0,0.2,0
P,o,P4,30,20,20,0,0,0,2,0,0,0,0,0,0,0,0,0,0,0,0,0,0,2,0.2,0
P,p,P5,0,20,30,0,0,0,15,0,0,0,0,0,0,0,0,0,0,0,0,0,0,0,0.1,0
P,pw,Pw2,2,30,15,0,20,3,0,25,3,0,1,0,8,3,0,0,0,0,0,0,0,5,0.2,1
P,pw,Pw3,0,8,10,0,15,5,0,15,7,0,0,0,10,2,0,0,0,0,0,0,0,7,0.2,1
P,p,P6,5,6,5,0,0,10,0,0,0,0,3,0,0,0,0,0,0,0,0,0,0,0,0.1,0
P,p,P7,11,8,7,1,0,15,5,0,1,0,3,2,3,1,0,0,0,0,0,0,0,1,0.2,0
P,p,P8,15,10,10,0,0,11,0,2,0,0,4,0,5,1,0,0,0,0,0,0,0,0,0.2,0
P,p,P9,10,9,6,2,1,10,6,0,2,0,2,5,4,1,0,0,0,0,0,0,0,2,0.3,0
P,p,P10,6,12,8,1,0,8,7,0,0,0,2,2,6,2,0,0,0,0,0,0,0,0,0.2,0
P,p,P11,7,7,10,0,2,10,0,3,0,0,1,1,2,1,0,0,0,0,0,0,0,2,0.1,0
B,bw,Bw9,1,21,12,0,0,3,0,12,3,1,0,1,2,3,0,0,0,30,15,3,0,11,0.8,1
B,bw,Bw10,6,18,25,0,0,1,0,21,8,2,1,0,8,7,0,0,0,25,10,5,0,19,1,1
B,bw,Bw11,4,23,27,0,0,1,0,24,12,0,1,1,9,9,0,0,0,20,20,7,0,28,1.2,1
B,b,B1,12,10,2,1,3,25,5,10,1,12,2,15,2,1,0,0,0,2,2,1,1,0,1.2,0
B,b,B2,11,8,4,2,2,31,7,4,2,14,3,12,1,2,0,1,0,0,4,2,2,2,1,0
B,b,B3,10,11,7,1,0,27,12,7,1,19,4,11,3,0,0,1,0,2,5,0,3,0,0.9,0
B,b,B4,17,10,3,2,1,19,11,5,0,21,2,10,0,0,0,0,0,4,4,2,3,5,0.5,0
B,b,B5,19,9,9,0,1,0,4,2,0,23,5,9,1,1,0,1,0,0,6,1,4,0,1.3,0
B,b,B6,21,7,11,1,2,1,21,7,1,31,1,7,4,1,0,1,0,1,2,0,1,0,1.2,0
B,b,B7,29,5,10,2,3,0,13,1,2,30,3,8,0,0,0,2,0,3,3,3,1,4,1,0
